# Supplementary material for: Nanostructured palladium-reduced graphene oxide platform for high sensitive, label free detection of a cancer biomarker
Source: Royal Society of Chemistry journal article supplement (doi:10.1039/c3ra41986j), 2013-12-04
Supplement: c3ra41986j.pdf [file c3ra41986j.pdf]

## Electronic Supporting Information (ESI†)

### Nanostructured palladium-reduced graphene oxide platform for high sensitive, label free detection of cancer biomarker

Vinod Kumar, Saurabh Srivastava, Sima Umrao, Ram Kumar, Gopal Nath, Gajjala Sumana, Preeti S. Saxena and Anchal Srivastava

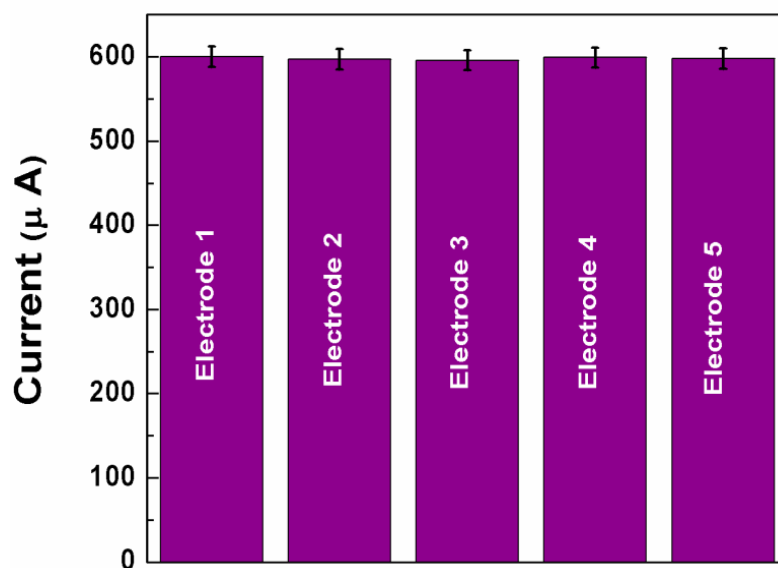

**Fig. S1** CV response of different BSA-anti-PSA/Pd@rGO/ITO immunoelectrodes fabricated via the same set of procedure with PSA (1 ng/ml), conducted in PBS (pH 7.4) containing 5 mM [ $\text{Fe}(\text{CN})_6$ ] $^{3-/4-}$

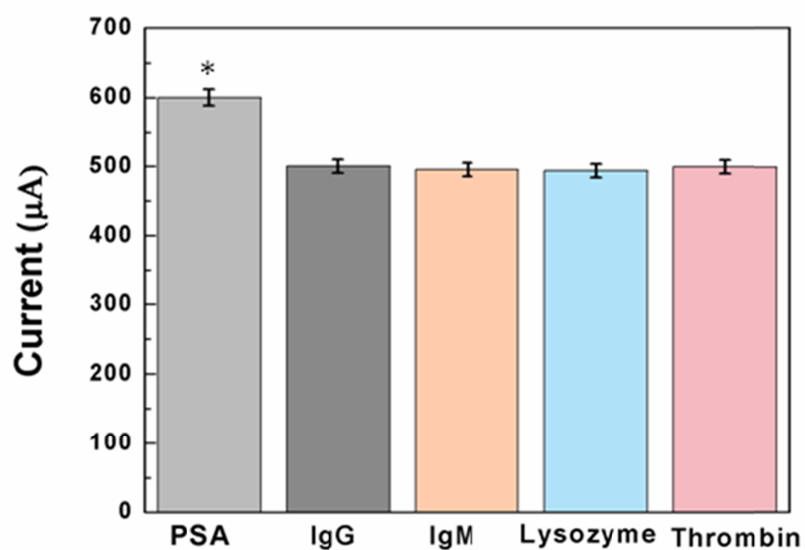

**Fig. S2** CV response of BSA-anti-PSA/Pd@rGO/ITO immunoelectrode in the presence of IgG, IgM, lysozyme and thrombin (ANOVA, \* $p < 0.05$ )

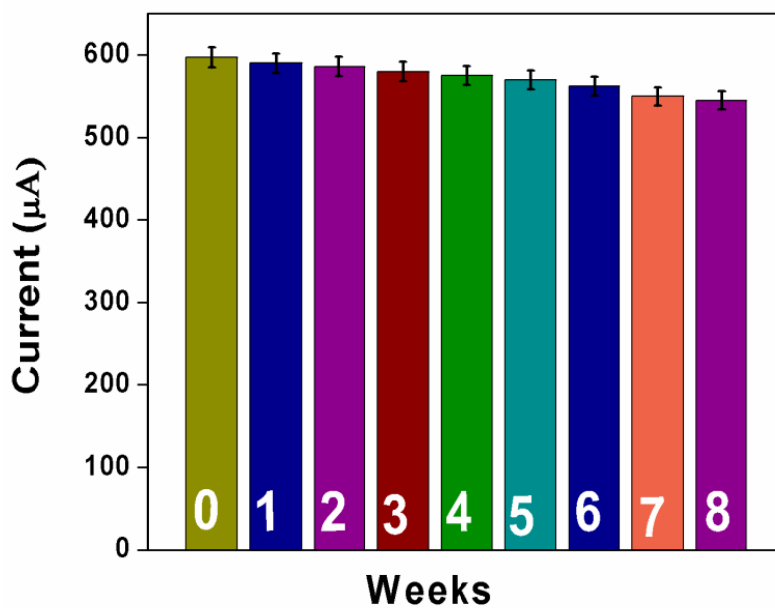

**Fig. S3** CV response of BSA-anti-PSA/Pd@rGO/ITO electrode measured at a regular interval of one week conducted in PBS

**Table S1. Comparison of performance of some electrochemical immunosensors for the detection of PSA**

| Modified electrodes                                           | Linear range (ng/ml) | Detection limit (ng/ml) | Reference           |
|---------------------------------------------------------------|----------------------|-------------------------|---------------------|
| Alkaline phosphatase modified Si nanoparticles                | 1-33                 | 0.76                    | 1                   |
| HRP                                                           | 1-40                 | 1                       | 2                   |
| HRP modified carbon nanotube                                  | 0.4-40               | 0.004                   | 3                   |
| Quantum dot                                                   | 0.05-4               | 0.02                    | 4                   |
| Dumbbell-like Au-Fe <sub>3</sub> O <sub>4</sub> nanoparticles | 0.01–10              | 0.005                   | 5                   |
| Ionic liquid–carbon nanotubes modified electrode              | 0.2–1.0 and 1–40     | 0.020                   | 6                   |
| Hollow mesoporous silica microspheres                         | 0.01–10              | 0.006                   | 7                   |
| Graphene/methylene blue Nanohybrid                            | 0.05–5.00            | 0.013                   | 8                   |
| Pd@rGO /ITO                                                   | 0.01-12.5            | 0.01                    | <b>Current work</b> |
| rGO/ITO                                                       | 0.1-12.5             | 0.1                     |                     |

## References

1. B. Qu, X. Chu, G. Shen, and R. Yu, *Talanta*, 2008, **76**, 785–90.
2. B. V Chikkaveeraiah, A. Bhirde, R. Malhotra, V. Patel, J. S. Gutkind, and J. F. Rusling, *Analytical chemistry*, 2009, **81**, 9129–34.
3. X. Yu, B. Munge, V. Patel, G. Jensen, A. Bhirde, J. D. Gong, S. N. Kim, J. Gillespie, J. S. Gutkind, F. Papadimitrakopoulos, and J. F. Rusling, *Journal of the American Chemical Society*, 2006, **128**, 11199–205.
4. G. Liu, Y.-Y. Lin, J. Wang, H. Wu, C. M. Wai, and Y. Lin, *Analytical chemistry*, 2007, **79**, 7644–53.
5. Q. Wei, Z. Xiang, J. He, G. Wang, H. Li, Z. Qian, and M. Yang, *Biosensors & bioelectronics*, 2010, **26**, 627–31.
6. A. Salimi, B. Kavosi, F. Fathi, and R. Hallaj, *Biosensors & bioelectronics*, 2013, **42**, 439–46.
7. D. Wu, R. Li, H. Wang, S. Liu, H. Wang, Q. Wei, and B. Du, *The Analyst*, 2012, **137**, 608–13.
8. K. Mao, D. Wu, Y. Li, H. Ma, Z. Ni, H. Yu, C. Luo, Q. Wei, and B. Du, *Analytical biochemistry*, 2012, **422**, 22–7.
